# Supplementary material for: Stabilisation energy of C6H6⋯C6X6(X = F, Cl, Br, I, CN) complexes: complete basis set limit calculations at MP2 and CCSD(T) levels
Source: Royal Society of Chemistry journal article supplement (doi:10.1039/b615318f), 2007-01-01
Supplement: b615318f.pdf [file b615318f.pdf]

24

benzene-benzene

|   |           |           |           |
|---|-----------|-----------|-----------|
| C | 0.696750  | 1.206800  | 1.829850  |
| C | 1.393500  | 0.000000  | 1.829850  |
| C | 0.696750  | -1.206800 | 1.829850  |
| C | -0.696750 | -1.206800 | 1.829850  |
| C | -1.393500 | 0.000000  | 1.829850  |
| C | -0.696750 | 1.206800  | 1.829850  |
| H | 2.475190  | 0.000000  | 1.826710  |
| H | 1.237600  | -2.143580 | 1.826710  |
| H | -1.237600 | -2.143580 | 1.826710  |
| H | -2.475190 | 0.000000  | 1.826710  |
| H | -1.237600 | 2.143580  | 1.826710  |
| H | 1.237600  | 2.143580  | 1.826710  |
| C | 1.393500  | 0.000000  | -1.829850 |
| C | 0.696750  | -1.206800 | -1.829850 |
| C | -0.696750 | -1.206800 | -1.829850 |
| C | -1.393500 | 0.000000  | -1.829850 |
| C | -0.696750 | 1.206800  | -1.829850 |
| C | 0.696750  | 1.206800  | -1.829850 |
| H | 2.475190  | 0.000000  | -1.826710 |
| H | 1.237600  | -2.143580 | -1.826710 |
| H | -1.237600 | -2.143580 | -1.826710 |
| H | -2.475190 | 0.000000  | -1.826710 |
| H | -1.237600 | 2.143580  | -1.826710 |
| H | 1.237600  | 2.143580  | -1.826710 |

24

benzene-hexafluorobenzene

|   |           |           |           |
|---|-----------|-----------|-----------|
| C | -1.207920 | -0.697400 | -2.332550 |
| C | -1.207920 | 0.697400  | -2.332550 |
| C | 0.000000  | 1.394790  | -2.332550 |
| C | 1.207920  | 0.697400  | -2.332550 |
| C | 1.207920  | -0.697400 | -2.332550 |
| C | 0.000000  | -1.394790 | -2.332550 |
| H | -2.144740 | -1.238270 | -2.330460 |
| H | -2.144740 | 1.238270  | -2.330460 |
| H | 0.000000  | 2.476530  | -2.330460 |
| H | 2.144740  | 1.238270  | -2.330460 |
| H | 2.144740  | -1.238270 | -2.330460 |
| H | 0.000000  | -2.476530 | -2.330460 |
| C | -1.202360 | -0.694180 | 1.010080  |
| C | -1.202360 | 0.694180  | 1.010080  |
| C | 0.000000  | 1.388360  | 1.010080  |
| C | 1.202360  | 0.694180  | 1.010080  |
| C | 1.202360  | -0.694180 | 1.010080  |
| C | 0.000000  | -1.388360 | 1.010080  |
| F | -2.353040 | -1.358530 | 0.959730  |
| F | -2.353040 | 1.358530  | 0.959730  |
| F | 0.000000  | 2.717050  | 0.959730  |
| F | 2.353040  | 1.358530  | 0.959730  |
| F | 2.353040  | -1.358530 | 0.959730  |
| F | 0.000000  | -2.717050 | 0.959730  |

24

benzene-hexachlorobenzene

|   |            |            |            |
|---|------------|------------|------------|
| C | -1.2079044 | -0.6973839 | -2.6359705 |
| C | -1.2079044 | 0.6973839  | -2.6359705 |
| C | 0.0000000  | 1.3947678  | -2.6359705 |
| C | 1.2079044  | 0.6973839  | -2.6359705 |
| C | 1.2079044  | -0.6973839 | -2.6359705 |
| C | 0.0000000  | -1.3947678 | -2.6359705 |
| H | -2.1447033 | -1.2382450 | -2.6369329 |
| H | -2.1447033 | 1.2382450  | -2.6369329 |
| H | 0.0000000  | 2.4764901  | -2.6369329 |

|    |            |            |            |
|----|------------|------------|------------|
| H  | 2.1447033  | 1.2382450  | -2.6369329 |
| H  | 2.1447033  | -1.2382450 | -2.6369329 |
| H  | 0.0000000  | -2.4764901 | -2.6369329 |
| C  | -1.2126365 | -0.7001160 | 0.7459717  |
| C  | -1.2126365 | 0.7001160  | 0.7459717  |
| C  | 0.0000000  | 1.4002320  | 0.7459717  |
| C  | 1.2126365  | 0.7001160  | 0.7459717  |
| C  | 1.2126365  | -0.7001160 | 0.7459717  |
| C  | 0.0000000  | -1.4002320 | 0.7459717  |
| Cl | -2.6952575 | -1.5561076 | 0.7152852  |
| Cl | -2.6952575 | 1.5561076  | 0.7152852  |
| Cl | 0.0000000  | 3.1122153  | 0.7152852  |
| Cl | 2.6952575  | 1.5561076  | 0.7152852  |
| Cl | 2.6952575  | -1.5561076 | 0.7152852  |
| Cl | 0.0000000  | -3.1122153 | 0.7152852  |

24

benzene-hexabromobenzene

|    |            |            |            |
|----|------------|------------|------------|
| C  | -1.2030821 | 0.6945998  | 2.9422111  |
| C  | -1.2030821 | -0.6945998 | 2.9422111  |
| C  | 0.0000000  | -1.3891996 | 2.9422111  |
| C  | 1.2030821  | -0.6945998 | 2.9422111  |
| C  | 1.2030821  | 0.6945998  | 2.9422111  |
| C  | 0.0000000  | 1.3891996  | 2.9422111  |
| H  | -2.1356756 | 1.2330329  | 2.9448751  |
| H  | -2.1356756 | -1.2330329 | 2.9448751  |
| H  | 0.0000000  | -2.4660658 | 2.9448751  |
| H  | 2.1356756  | -1.2330329 | 2.9448751  |
| H  | 2.1356756  | 1.2330329  | 2.9448751  |
| H  | 0.0000000  | 2.4660658  | 2.9448751  |
| C  | -1.2084896 | 0.6977218  | -0.4378447 |
| C  | -1.2084896 | -0.6977218 | -0.4378447 |
| C  | 0.0000000  | -1.3954436 | -0.4378447 |
| C  | 1.2084896  | -0.6977218 | -0.4378447 |
| C  | 1.2084896  | 0.6977218  | -0.4378447 |
| C  | 0.0000000  | 1.3954436  | -0.4378447 |
| Br | -2.8178933 | 1.6269115  | -0.4135788 |
| Br | -2.8178933 | -1.6269115 | -0.4135788 |
| Br | 0.0000000  | -3.2538230 | -0.4135788 |
| Br | 2.8178933  | -1.6269115 | -0.4135788 |
| Br | 2.8178933  | 1.6269115  | -0.4135788 |
| Br | 0.0000000  | 3.2538230  | -0.4135788 |

30

benzene-hexacyanobenzene

|   |            |            |            |
|---|------------|------------|------------|
| C | 1.2157796  | -0.7019307 | -0.9042246 |
| C | 2.4470067  | -1.4127800 | -0.8488749 |
| C | 1.2157796  | 0.7019307  | -0.9042246 |
| C | 0.0000000  | 1.4038614  | -0.9042246 |
| C | -1.2157796 | 0.7019307  | -0.9042246 |
| C | -1.2157796 | -0.7019307 | -0.9042246 |
| C | 0.0000000  | -1.4038614 | -0.9042246 |
| C | 2.4470067  | 1.4127800  | -0.8488749 |
| C | 0.0000000  | 2.8255600  | -0.8488749 |
| C | -2.4470067 | 1.4127800  | -0.8488749 |
| C | -2.4470067 | -1.4127800 | -0.8488749 |
| C | 0.0000000  | -2.8255600 | -0.8488749 |
| N | 0.0000000  | 3.9999228  | -0.7893237 |
| N | -3.4640348 | 1.9999614  | -0.7893237 |
| N | -3.4640348 | -1.9999614 | -0.7893237 |
| N | 0.0000000  | -3.9999228 | -0.7893237 |
| N | 3.4640348  | -1.9999614 | -0.7893237 |
| N | 3.4640348  | 1.9999614  | -0.7893237 |
| C | 1.2088345  | -0.6979209 | 2.4653941  |
| C | 1.2088345  | 0.6979209  | 2.4653941  |

|   |            |            |           |
|---|------------|------------|-----------|
| C | 0.0000000  | 1.3958418  | 2.4653941 |
| C | -1.2088345 | 0.6979209  | 2.4653941 |
| C | -1.2088345 | -0.6979209 | 2.4653941 |
| C | 0.0000000  | -1.3958418 | 2.4653941 |
| H | 2.1459896  | -1.2389877 | 2.4805739 |
| H | 2.1459896  | 1.2389877  | 2.4805739 |
| H | 0.0000000  | 2.4779754  | 2.4805739 |
| H | -2.1459896 | 1.2389877  | 2.4805739 |
| H | -2.1459896 | -1.2389877 | 2.4805739 |
| H | 0.0000000  | -2.4779754 | 2.4805739 |
